# Supplementary material for: Genomic Profiling of Uterine Aspirates and cfDNA as an Integrative Liquid Biopsy Strategy in Endometrial Cancer
Source: PubMed Central journal article supplement (PMC7073542; doi:10.3390/jcm9020585), 2020-02-21
Supplement: jcm-09-00585-s001.pdf [file jcm-09-00585-s001.pdf]

Table S1. List of tumor-specific mutations identified by NGS in the UAs obtained from patients with EC at surgery.

| GENE           | ID               | NUCLEOTIDE    | PROTEIN      | GAIN/LOSS                                    | FREQUENCY (MAFs) |
|----------------|------------------|---------------|--------------|----------------------------------------------|------------------|
| <i>CTNNB1</i>  | <b>EndoBL005</b> | c.110C>T      | p.Ser37Phe   | Gain                                         | <b>25.35</b>     |
| <i>PIK3CA</i>  |                  | c.1258T>C     | p.Cys420Arg  | Gain                                         | <b>22.57</b>     |
| <i>FGFR2</i>   |                  | c.755C>G      | p.Ser252Trp  | Gain                                         | <b>20.42</b>     |
| <i>PIK3CA</i>  | <b>EndoBL007</b> | c.263G>A      | p.Arg88Gln   | Gain                                         | <b>43.91</b>     |
| <i>KRAS</i>    |                  | c.35G>A       | p.Gly12Asp   | Gain                                         | <b>19.87</b>     |
| <i>PIK3CA</i>  | <b>EndoBL009</b> | c.113G>A      | p.Arg38His   | Gain                                         | <b>9.26</b>      |
| <i>PIK3CA</i>  |                  | c.3074C>G     | p.Thr1025Ser | Gain                                         | <b>19.12</b>     |
| <i>KRAS</i>    |                  | c.35G>A       | p.Gly12Asp   | Gain                                         | <b>21.21</b>     |
| <i>TP53</i>    | <b>EndoBL010</b> | c.613T>G      | p.Y205D      | Loss                                         | <b>19.66</b>     |
| <i>PIK3CA</i>  |                  | c.323G>A      | p.Arg108His  |                                              | <b>53.23</b>     |
| <i>KRAS</i>    | <b>EndoBL013</b> | c.175G>A      | p.Ala59Thr   | Gain                                         | <b>25.2</b>      |
| <i>MYC</i>     | <b>EndoBL015</b> | amplification |              | Gain                                         | <b>5.41</b>      |
| <i>CCNE1</i>   |                  | amplification |              | Gain                                         | <b>16.21</b>     |
| <i>TP53</i>    |                  | c.524G>A      | p.R175H      | Loss                                         | <b>10</b>        |
| <i>KRAS</i>    |                  | amplification |              | Gain                                         | <b>8.56</b>      |
| <i>CTNNB1</i>  | <b>EndoBL019</b> | c.98C>T       | p.Ser33Phe   | Gain                                         | <b>48.72</b>     |
| <i>AKT1</i>    |                  | c.49G>A       | p.Glu17Lys   | Gain                                         | <b>55.81</b>     |
| <i>PPP2RIA</i> | <b>EndoBL022</b> | c.770G>T      | p.W257L      | Gain                                         | <b>45.37</b>     |
| <i>TP53</i>    |                  | c.838A>G      | p.R280G      | conflicting interpretations of pathogenicity | <b>56.97</b>     |

|               |                  |                            |              |         |              |
|---------------|------------------|----------------------------|--------------|---------|--------------|
| <b>PIK3CA</b> | <b>EndoBL024</b> | copy number mean<br>(8.66) |              | Gain    |              |
| <i>KRAS</i>   | <b>EndoBL026</b> | c.437C>T                   | p.Ala146Val  | Gain    | <b>26.15</b> |
| <i>PIK3CA</i> | <b>EndoBL028</b> | c.1633G>A                  | p.Glu545Lys  | Gain    | <b>30.05</b> |
| <i>PTEN</i>   |                  | c.389G>C                   | p.Arg130Pro  | Loss    | <b>44.91</b> |
| <i>CTNNB1</i> | <b>EndoBL029</b> | c.110C>T                   | p.Ser37Phe   | Gain    | <b>28.9</b>  |
| <i>PIK3CA</i> |                  | c.3127A>G                  | p.Met1043Val | Gain    | <b>30.47</b> |
| <i>ESR1</i>   |                  | c.1610A>C                  | p.Tyr537Ser  | Gain    | <b>33.03</b> |
| <i>PTEN</i>   |                  | c.511C>T                   | p.Gln171Ter  | Loss    | <b>27.29</b> |
| <i>FGFR2</i>  |                  | c.755C>G                   | p.Ser252Trp  | Gain    | <b>31.97</b> |
| <i>POLE</i>   | <b>EndoBL031</b> | c.857C>G                   | p.Pro286Arg  | Loss    | <b>14</b>    |
| <i>ARID1A</i> |                  | c.5299G>T                  | p.Glu1767Ter | Loss    | <b>36.46</b> |
| <i>PIK3CA</i> |                  | c.333G>T                   | p.Lys111Asn  | Gain    | <b>25</b>    |
| <i>PIK3CA</i> |                  | c.1357G>A                  | p.Glu453Lys  | Gain    | <b>41.3</b>  |
| <i>PIK3CA</i> |                  | c.3141T>G                  | p.His1047Gln | Gain    | <b>38.13</b> |
| <i>ATM</i>    |                  | c.748C>T                   | p.Arg250Ter  | Loss    | <b>38.94</b> |
| <i>RB1</i>    |                  | c.7348C>T                  | p.Arg2450Ter | Loss    | <b>36.51</b> |
| <i>MLH1</i>   | <b>EndoBL034</b> | c.2035G>T                  | p.Glu679Ter  | Loss    | <b>16.78</b> |
| <i>CTNNB1</i> |                  | c.94G>A                    | p.Asp32Asn   | Gain    | <b>6.26</b>  |
| <i>PIK3CA</i> |                  | c.263G>A                   | p.Arg88Gln   | Gain    | <b>15.96</b> |
| <i>PIK3R1</i> |                  | c.1519G>T                  | p.Glu507Ter  | Loss    | <b>16.15</b> |
| <i>PTEN</i>   |                  | c.373A>G                   | p.Lys125Glu  | Loss    | <b>15.41</b> |
| <i>PTEN</i>   |                  | c.462C>A                   | p.Phe154Leu  | Loss    | <b>16.51</b> |
| <i>ATM</i>    |                  | c.742C>T                   | p.Arg248Ter  | Loss    | <b>15.02</b> |
| <i>POLE</i>   |                  | c.857C>G                   | p.Pro286Arg  | Loss    | <b>16.8</b>  |
| <i>RB1</i>    |                  | c.709G>T                   | p.Glu237Ter  | Loss    | <b>13.78</b> |
| <i>SLX4</i>   |                  | c.4523C>T                  | p.Ser1508Leu | Unknown | <b>14.98</b> |

|                |                     |                             |              |         |                                |
|----------------|---------------------|-----------------------------|--------------|---------|--------------------------------|
| <i>CTNNB1</i>  | <b>EndoBL_MDA_1</b> | c.98C>G                     | p.Ser33Cys   | Gain    | <b>34.48</b>                   |
| <i>PIK3CA</i>  |                     | c.1634A>C                   | p.Glu545Ala  | Gain    | <b>25</b>                      |
| <i>PTEN</i>    | <b>EndoMDA044</b>   | c.881_882delGT              | p.Ser294fs   | Loss    | <b>40.66</b>                   |
| <i>KRAS</i>    |                     | c.34G>A                     | p.Gly12Ser   | Gain    | <b>39.4</b>                    |
| <i>NRAS</i>    | <b>Endo VH02</b>    | c.182A>G                    | p.Gln61Arg   | Gain    | <b>12.61</b>                   |
| <i>TP53</i>    |                     | c.610G>T                    | p.Glu204Ter  | Loss    | <b>28.47</b>                   |
| <i>PIK3CA</i>  | <b>Endo VH14</b>    | c.3129G>T                   | p.Met1043Ile | Gain    | <b>37.96</b>                   |
| <i>RICTOR</i>  |                     | copy number mean<br>(5.78)  |              | Gain    | <b>5%:5.06. 95%:6.6</b>        |
| <i>TP53</i>    |                     | c.722C>G                    | p.Ser241Cys  | Loss    | <b>74.55</b>                   |
| <i>PPP2RIA</i> |                     | c.767C>A                    | p.Ser256Tyr  | Gain    | <b>29.34</b>                   |
| <i>PTEN</i>    | <b>Endo VH30</b>    | c.362C>A                    | p.Ala121Glu  | Loss    | <b>40.55</b>                   |
| <i>PTEN</i>    |                     | c.638delC                   | p.Pro213fs   | Loss    | <b>43.05</b>                   |
| <i>RBI</i>     |                     | c.1001G>T                   | p.Arg334Ile  | Unknown | <b>12.06</b>                   |
| <i>TP53</i>    |                     | c.838A>G                    | p.Arg280Gly  | Loss    | <b>14.09</b>                   |
| <i>CCNE1</i>   |                     | copy number mean<br>(19.69) |              | Gain    | <b>5%:16.82.<br/>95%:23.04</b> |
| <i>PTEN</i>    | <b>EndoVH33</b>     | c.389G>C                    | p.Arg130Pro  | Loss    | <b>20.4</b>                    |
| <i>ARIDIA</i>  | <b>Endo VH35</b>    | c.5965C>T                   | p.Arg1989Ter | Loss    | <b>43.57</b>                   |
| <i>CTNNB1</i>  |                     | c.110C>T                    | p.Ser37Phe   | Gain    | <b>39.61</b>                   |
| <i>PIK3CA</i>  |                     | c.3129G>T                   | p.Met1043Ile | Gain    | <b>40.1</b>                    |
| <i>FBXW7</i>   |                     | c.1972C>T                   | p.Arg658Ter  | Loss    | <b>42.61</b>                   |
| <i>PIK3R1</i>  |                     | c.1042C>T                   | p.Arg348Ter  | Loss    | <b>87.16</b>                   |
| <i>PTEN</i>    |                     | c.19G>T                     | p.Glu7Ter    | Loss    | <b>43.37</b>                   |
| <i>CREBBP</i>  |                     | c.3955C>T                   | p.Arg1319Ter | Loss    | <b>34.18</b>                   |
| <i>FGFR3</i>   | <b>964</b>          | copy number mean<br>(5.77)  |              | Gain    | <b>5%:5.19,<br/>95%:6.42</b>   |

|                              |                  |                            |              |      |                              |
|------------------------------|------------------|----------------------------|--------------|------|------------------------------|
| <i>ARID1A</i>                | <b>970</b>       | c.5164C>T                  | p.Arg1722Ter | Loss | <b>4.35</b>                  |
| <i>CTNNB1</i>                |                  | c.110C>T                   | p.Ser37Phe   | Gain | <b>41.12</b>                 |
| <i>PIK3CA</i>                |                  | c.331A>G                   | p.Lys111Glu  | Loss | <b>37.92</b>                 |
| <i>FBXW7</i>                 |                  | c.1393C>T                  | p.Arg465Cys  | Gain | <b>3.7</b>                   |
| <i>BRAF</i>                  | <b>971</b>       | c.1742A>G                  | p.Asn581Ser  | Gain | <b>45.6</b>                  |
| <i>WHSC1L1(1) - FGFR1(2)</i> |                  | Gene fusion                |              | Gain | <b>2927 counts</b>           |
| <i>PTEN</i>                  |                  | c.916delA                  | p.Ile306Ter  | Loss | <b>50.17</b>                 |
| <i>RBI</i>                   |                  | c.2087_2090delGA<br>GA     | p.Arg696fs   | Loss | <b>13.15</b>                 |
| <i>POLE</i>                  | <b>1002</b>      |                            |              |      |                              |
| <i>PIK3CA</i>                | <b>1009</b>      | c.317G>T                   | p.Gly106Val  | Gain | <b>34.8</b>                  |
| <i>CDK2</i>                  |                  | copy number mean<br>(5.64) |              | Gain | <b>5%:5.02,<br/>95%:6.34</b> |
| <i>NOTCH3</i>                |                  | c.2538_2539insT            | p.Asp847Ter  | Loss | <b>3.5</b>                   |
| <i>MTOR</i>                  | <b>EndoBL053</b> | c.6644C>T                  | p.Ser2215Phe | Gain | <b>36.29</b>                 |
| <i>PIK3CA</i>                |                  | c.3129G>T                  | p.Met1043Ile | Gain | <b>38.27</b>                 |
| <i>PTEN</i>                  |                  | c.144C>A                   | p.Asn48Lys   | Loss | <b>39.97</b>                 |
| <i>PTEN</i>                  |                  | c.389delG                  | p.Arg130fs   | Loss | <b>40.61</b>                 |
| <i>KRAS</i>                  |                  | c.38G>A                    | p.Gly13Asp   | Gain | <b>39.29</b>                 |
| <i>ARID1A</i>                | <b>EndoBL056</b> | c.4003C>T                  | p.Arg1335Ter | Loss | <b>22.31</b>                 |
| <i>PIK3CA</i>                |                  | c.1636C>A                  | p.Gln546Lys  | Gain | <b>26.13</b>                 |
| <i>PIK3R1</i>                |                  | c.1669C>T                  | p.Arg557Ter  | Loss | <b>37.66</b>                 |
| <i>PTEN</i>                  |                  | c.367C>G                   | p.His123Asp  | Loss | <b>35.91</b>                 |
| <i>PTEN</i>                  |                  | c.388C>G                   | p.Arg130Gly  | Loss | <b>34.72</b>                 |
| <i>TP53</i>                  |                  | c.817C>T                   | p.Arg273Cys  | Loss | <b>4.57</b>                  |
| <i>TP53</i>                  |                  | c.583A>T                   | p.Ile195Phe  | Loss | <b>4.11</b>                  |
| <i>TP53</i>                  |                  | c.430C>T                   | p.Gln144Ter  | Loss | <b>7.69</b>                  |

|                |                  |                                |              |         |                              |
|----------------|------------------|--------------------------------|--------------|---------|------------------------------|
| <i>ARID1A</i>  | <b>EndoBL057</b> | c.5890G>T                      | p.Glu1964Ter | Loss    | <b>17.33</b>                 |
| <i>CDK2</i>    |                  | copy number mean<br>(5.27)     |              | Gain    | <b>5%:4.22,<br/>95%:6.58</b> |
| <i>TP53</i>    |                  | c.876delA                      | p.Glu294fs   | Loss    | <b>&lt;5%</b>                |
| <i>ERBB2</i>   |                  | copy number mean<br>(5.43)     |              | Gain    | <b>5%:4.58.<br/>95%:6.44</b> |
| <i>PIK3CA</i>  | <b>EndoBL036</b> | c.263G>A                       | p.Arg88Gln   | Gain    | <b>24.06</b>                 |
| <i>PIK3CA</i>  |                  | c.353G>A                       | p.Gly118Asp  | Gain    | <b>19.53</b>                 |
| <i>FGFR2</i>   |                  | c.1647T>A                      | p.Asn549Lys  | Unknown | <b>49.82</b>                 |
| <i>ARID1A</i>  |                  | c.482_495delTCGC<br>CGCCGCCGCG | p.Val161fs   | Unknown | <b>14.47</b>                 |
| <i>PTEN</i>    | <b>EndoBL039</b> | c.81_82insT                    | p.Ile28fs    | Loss    | <b>37.04</b>                 |
| <i>TP53</i>    |                  | c.569C>T                       | p.Pro190Leu  | Loss    | <b>74.76</b>                 |
| <i>PIK3CA</i>  | <b>EndoBL040</b> | c.1634A>G                      | p.Glu545Gly  | Gain    | <b>19.68</b>                 |
| <i>PTEN</i>    |                  | c.388C>G                       | p.Arg130Gly  | Loss    | <b>39.91</b>                 |
| <i>FGFR1</i>   |                  | c.495_497delTGA                | p.Asp166del  | Gain    | <b>13.28</b>                 |
| <i>PPP2RIA</i> |                  | c.547C>T                       | p.Arg183Trp  | Gain    | <b>42.38</b>                 |
| <i>CTNNB1</i>  | <b>EndoBL041</b> | c.121A>G                       | p.Thr41Ala   | Gain    | <b>44.29</b>                 |
| <i>RNF43</i>   |                  | c.1585C>T                      | p.Arg529Trp  | Unknown | <b>48.62</b>                 |
| <i>PTEN</i>    |                  | c.442G>A                       | p.Ala148Thr  | Loss    | <b>47.94</b>                 |
| <i>NOTCH2</i>  | <b>EndoBL042</b> | c.5356C>T                      | p.Arg1786Ter | Loss    | <b>25.83</b>                 |
| <i>XPO1</i>    |                  | c.1711G>A                      | p.Glu571Lys  | Gain    | <b>17.87</b>                 |
| <i>PIK3CA</i>  |                  | c.1030G>A                      | p.Val344Met  | Gain    | <b>35.36</b>                 |
| <i>PIK3CA</i>  |                  | c.3062A>G                      | p.Tyr1021Cys | Gain    | <b>37.67</b>                 |
| <i>FBXW7</i>   |                  | c.979G>T                       | p.Glu327Ter  | Loss    | <b>36.67</b>                 |
| <i>PIK3R1</i>  |                  | c.1042C>T                      | p.Arg348Ter  | Loss    | <b>33.41</b>                 |
| <i>PIK3R1</i>  |                  | c.1156C>T                      | p.Arg386Ter  | Loss    | <b>33.87</b>                 |
| <i>PTEN</i>    |                  | c.101C>T                       | p.Ala34Val   | Loss    | <b>32.72</b>                 |

|                             |                   |                         |                   |                                                      |                          |
|-----------------------------|-------------------|-------------------------|-------------------|------------------------------------------------------|--------------------------|
| <i>PTEN</i>                 |                   | c.545T>G                | p.Leu182Ter       | Loss                                                 | <b>36.62</b>             |
| <i>PTEN</i>                 |                   | c.697C>T                | p.Arg233Ter       | Loss                                                 | <b>9.8</b>               |
| <i>ATM</i>                  |                   | c.9022C>T               | p.Arg3008Cys      | Loss                                                 | <b>32.12</b>             |
| <i>FANCI</i>                |                   | c.1447G>T               | p.Glu483Ter       | Loss                                                 | <b>6.68</b>              |
| <i>TP53</i>                 |                   | c.1024C>T               | p.Arg342Ter       | Loss                                                 | <b>12.42</b>             |
| <i>NF1</i>                  |                   | c.532G>T                | p.Glu178Ter       | Loss                                                 | <b>34.37</b>             |
| <i>NF1</i>                  |                   | c.7348C>T               | p.Arg2450Ter      | Loss                                                 | <b>34.53</b>             |
| <i>MSH2</i>                 |                   | c.2272G>A               | p.Asp758Asn       | Unknown/potential pathogenic                         | <b>8.85</b>              |
| <i>POLE</i>                 |                   | c.4942G>A               | p.Glu1648Lys      | Loss                                                 | <b>34.15</b>             |
| <i>PTEN</i>                 | <b>EndoBL049</b>  | c.388C>T                | p.Arg130Ter       | Loss                                                 | <b>84.43</b>             |
| <i>ARID1A</i>               | <b>EndoMDA061</b> | c.1669C>T               | p.Gln557Ter       | Loss                                                 | <b>18.58</b>             |
| <i>PIK3CA</i>               |                   | c.1633G>A               | p.Glu545Lys       | Gain                                                 | <b>23.27</b>             |
| <i>PTEN</i>                 |                   | c.203A>G                | p.Tyr68Cys        | Loss                                                 | <b>24.45</b>             |
| <i>PTEN</i>                 |                   | c.388C>G                | p.Arg130Gly       | Loss                                                 | <b>24.4</b>              |
| <i>FGFR2</i>                |                   | c.755C>G                | p.Ser252Trp       | Gain                                                 | <b>21.6</b>              |
| <i>MAX</i>                  |                   | c.83A>G                 | p.His28Arg        | Gain                                                 | <b>20.8</b>              |
| <i>MET</i>                  |                   | c.1038C>G               | p.Phe346Leu       | Unknown                                              | <b>21.25</b>             |
| <i>TP53</i>                 | <b>EndoVH046</b>  | c.524G>A                | p.Arg175His       | Loss                                                 | <b>39.25</b>             |
| <i>CCNE1</i>                |                   | copy number mean (7.92) |                   | Gain                                                 | <b>5%:6.97, 95%:9.01</b> |
| <i>PALB2</i>                | <b>EndoVH012</b>  | c.656A>G                | p.Asp219Gly       | Unknown/conflicting interpretations of pathogenicity | <b>50.70</b>             |
| <i>ESR1(2) - CCDC170(8)</i> | <b>EndoMDA062</b> | fusion                  | ESR1-CCDC170.E2C8 | Gain                                                 | <b>186 copies</b>        |
| <i>PTEN</i>                 | <b>EndoBL37</b>   | c.389G>C                | p.Arg130Pro       | Loss                                                 | <b>69</b>                |
| <i>PIK3R1</i>               |                   | c.978_982delGTCC T      | p.Met326fs        | Loss                                                 | <b>12.43</b>             |

|                |                 |                             |                  |      |                                |
|----------------|-----------------|-----------------------------|------------------|------|--------------------------------|
| <i>TP53</i>    | <b>EndoBL63</b> | c.1024C>T                   | p.Arg342Ter      | Loss | <b>68.88</b>                   |
| <i>PPP2RIA</i> |                 | c.536C>G                    | p.Pro179Arg      | Gain | <b>38.50</b>                   |
| <i>PIK3CA</i>  |                 | c.1049A>G                   | p.Asp350Gly      | Gain | <b>43.47</b>                   |
| <i>PIK3CA</i>  | <b>EndoBL65</b> | c.1357G>A                   | p.Glu453Lys      | Gain | <b>51.48</b>                   |
| <i>TP53</i>    |                 | c.955A>T                    | p.Lys319Ter      | Loss | <b>54.21</b>                   |
| <i>TP53</i>    |                 | c.518T>C                    | p.Val173Ala      | Loss | <b>25.95</b>                   |
| <i>ERBB2</i>   |                 | copy number mean<br>(4.89)  |                  | Gain | <b>5%:4.24,<br/>95%:5.64</b>   |
| <i>PPP2RIA</i> |                 | c.536C>G                    | p.Pro179Arg      | Gain | <b>38.97</b>                   |
| <i>CTNNB1</i>  | <b>VH_1049</b>  | c.110C>T                    | p.Ser37Phe       | Gain | <b>16.80</b>                   |
| <i>PTEN</i>    |                 | c.469delG                   | p.Glu157fs       | Loss | <b>24.13</b>                   |
| <i>ARIDIA</i>  | <b>VH_1056</b>  | c.3283C>T                   | p.Gln1095Ter     | Loss | <b>38.98</b>                   |
| <i>PTEN</i>    |                 | c.62delT                    | p.Phe21fs        | Loss | <b>39.7</b>                    |
| <i>PTEN</i>    |                 | c.388C>T                    | p.Arg130Ter      | Loss | <b>43.62</b>                   |
| <i>FGFR2</i>   |                 | c.1647T>A                   | p.Asn549Lys      | Gain | <b>40.10</b>                   |
| <i>ARIDIA</i>  | <b>VH_605</b>   | p.Gln505fs                  | c.1513_1514delCA | Loss | <b>26.28</b>                   |
| <i>CTNNB1</i>  |                 | p.Ser45del                  | c.133_135delTCT  | Gain | <b>27.76</b>                   |
| <i>PTEN</i>    |                 | p.Glu73Ter                  | c.217G>T         | Loss | <b>25.51</b>                   |
| <i>CCND3</i>   | <b>VH_766</b>   | copy number mean<br>(5.28)  |                  | Gain | <b>5%:4.49,<br/>95%:6.21</b>   |
| <i>MYC</i>     |                 | copy number mean<br>(29.63) |                  | Gain | <b>5%:25.39,<br/>95%:34.58</b> |
| <i>CCNE1</i>   |                 | copy number mean<br>(4.79)  |                  | Gain | <b>5%:4.07,<br/>95%:5.63</b>   |
| <i>AKT2</i>    |                 | copy number mean<br>(23.18) |                  | Gain | <b>5%:19.86,<br/>95%:27.05</b> |
| <i>PPP2RIA</i> |                 | p.Pro179Arg                 | c.536C>G         | Gain | <b>66.48</b>                   |
| <i>PIK3R1</i>  | <b>VH_928</b>   | p.Asp560His                 | c.1678G>C        | Loss | <b>4.4</b>                     |

|               |                |             |                                                        |      |              |
|---------------|----------------|-------------|--------------------------------------------------------|------|--------------|
| <i>TP53</i>   |                | p.Gly266Glu | c.797G>A                                               | Loss | <b>67.33</b> |
| <i>MSH2</i>   | <b>VH_959</b>  | p.Arg680Ter | c.2038C>T                                              | Loss | <b>49.27</b> |
| <i>FBXW7</i>  |                | p.Arg224Ter | c.670C>T                                               | Loss | <b>20.52</b> |
| <i>PTEN</i>   |                | p.Gln245Ter | c.733C>T                                               | Loss | <b>20.13</b> |
| <i>CDKN1B</i> |                | p.Pro137fs  | c.410delC                                              | Loss | <b>20.18</b> |
| <i>MAP2K1</i> |                | p.Pro124Ser | c.370C>T                                               | Gain | <b>23.66</b> |
| <i>ARID1A</i> | <b>VH_1012</b> | p.Tyr930fs  | c.2788delT                                             | Loss | <b>36.08</b> |
| <i>CTNNB1</i> |                | p.Ser33Phe  | c.98C>T                                                | Gain | <b>5.7</b>   |
| <i>PIK3CA</i> |                | p.Glu542Lys | c.1624G>A                                              | Gain | <b>25.45</b> |
| <i>FBXW7</i>  |                | p.Arg465Cys | c.1393C>T                                              | Loss | <b>24.11</b> |
| <i>PTEN</i>   |                | p.Glu43fs   | c.128_129delAA                                         | Loss | <b>32.06</b> |
| <i>PTEN</i>   |                | p.Arg233Ter | c.697C>T                                               | Loss | <b>25.4</b>  |
| <i>ERBB2</i>  |                | p.Gly776Val | c.2327G>T                                              | Gain | <b>26.89</b> |
| <i>PTEN</i>   | <b>VH_1077</b> | p.Arg130Gly | c.388C>G                                               | Loss | <b>26.75</b> |
| <i>RB1</i>    |                | p.Gln575Ter | c.1723C>T                                              | Loss | <b>11.88</b> |
| <i>TP53</i>   |                | p.Arg249Gly | c.745A>G                                               | Loss | <b>13.22</b> |
| <i>ARID1A</i> | <b>VH_1087</b> | p.Arg693Ter | c.2077C>T                                              | Loss | <b>20.37</b> |
| <i>ARID1A</i> |                | p.Ala2205fs | c.6611_6612insTCC<br>TGGGCTTCCTAG<br>AGGACAGCCTTG<br>C | Loss | <b>8.18</b>  |
| <i>PIK3CA</i> |                | p.Glu545Lys | c.1633G>A                                              | Gain | <b>16.15</b> |
| <i>PTEN</i>   |                | p.Asp92Asn  | c.274G>A                                               | Loss | <b>20.59</b> |
| <i>KRAS</i>   |                | p.Gly12Asp  | c.35G>A                                                | Gain | <b>34.32</b> |
| <i>CTNNB1</i> | <b>VH_1093</b> | p.Asp32Val  | c.95A>T                                                | Gain | <b>23</b>    |
| <i>PIK3CA</i> |                | p.Lys111Glu | c.331A>G                                               | Gain | <b>37.25</b> |
| <i>PIK3R1</i> |                | p.Ile571fs  | c.1710_1711insT                                        | Loss | <b>43.31</b> |



|                |                |                            |               |      |                               |
|----------------|----------------|----------------------------|---------------|------|-------------------------------|
| <i>PIK3R1</i>  |                | p.Met582fs                 | c.1743delG    | Loss | <b>43.37</b>                  |
| <i>PTEN</i>    |                | p.Arg130Gln                | c.389G>A      | Loss | <b>32.75</b>                  |
| <i>PTEN</i>    |                | p.Arg308fs                 | c.923delG     | Loss | <b>57.59</b>                  |
| <i>FBXW7</i>   | <b>VH_1099</b> | p.Arg465Cys                | c.1393C>T     | Loss | <b>29.85</b>                  |
| <i>TP53</i>    |                | p.Pro278Ser                | c.832C>T      | Loss | <b>17.95</b>                  |
| <i>CCNE1</i>   |                | copy number mean<br>(9.81) |               | Gain | <b>5%:8.32,<br/>95%:11.57</b> |
| <i>PPP2R1A</i> |                | p.Ser256Phe                | c.767C>T      | Gain | <b>26.22</b>                  |
| <i>PIK3CA</i>  | <b>VH_1114</b> | p.Asn345Ile                | c.1034A>T     | Gain | <b>30.75</b>                  |
| <i>PTEN</i>    |                | p.Leu139fs                 | c.416delT     | Loss | <b>55.39</b>                  |
| <i>FGFR2</i>   |                | p.Asn549Lys                | c.1647T>A     | Loss | <b>59.23</b>                  |
| <i>MAX</i>     |                | p.His28Arg                 | c.83A>G       | Gain | <b>26.81</b>                  |
| <i>SMARCA4</i> |                | p.Arg973Trp                | c.2917C>T     | Loss | <b>6.1</b>                    |
| <i>PIK3CA</i>  | <b>VH_1115</b> | copy number mean<br>(5.7)  |               | Gain | <b>5%:4.81,<br/>95%:6.75</b>  |
| <i>PIK3R1</i>  | <b>VH_1147</b> | p.Gln705Ter                | c.2113C>T     | Loss | <b>26.05</b>                  |
| <i>MET</i>     |                | p.Glu168Asp                | c.504G>T      | Gain | <b>49.68</b>                  |
| <i>PTEN</i>    |                | p.His123Tyr                | c.367C>T      | Loss | <b>29.86</b>                  |
| <i>PTEN</i>    |                | p.Gln149fs                 | c.445_446insT | Loss | <b>30.47</b>                  |
| <i>TP53</i>    |                | p.Gly244Cys                | c.730G>T      | Loss | <b>5.0</b>                    |

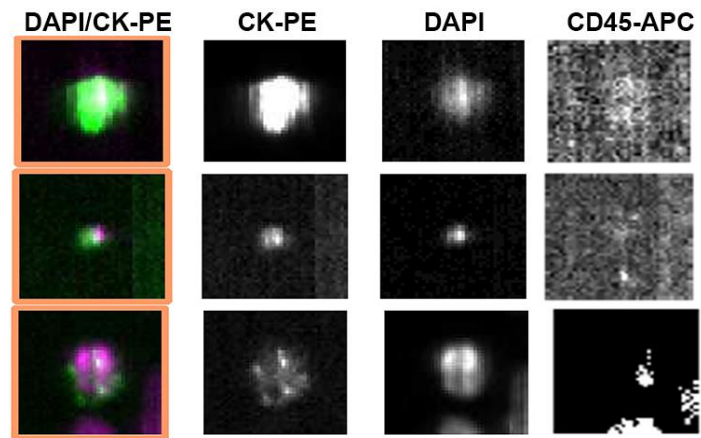

Figure S1. Representative examples of CTCs found in patients with EC (n = 36) using the CellSearch technology. Round-oval, DAPI<sup>+</sup>, CD45<sup>-</sup>, and CK<sup>+</sup> cells were considered CTCs.

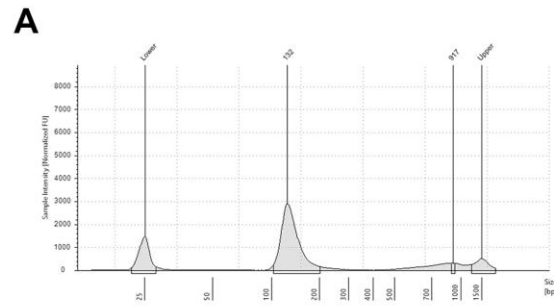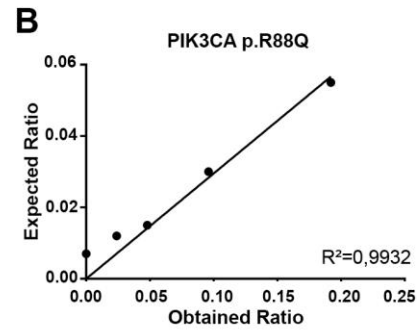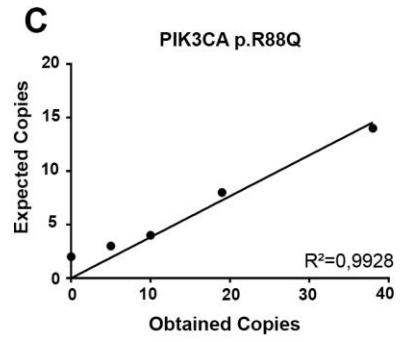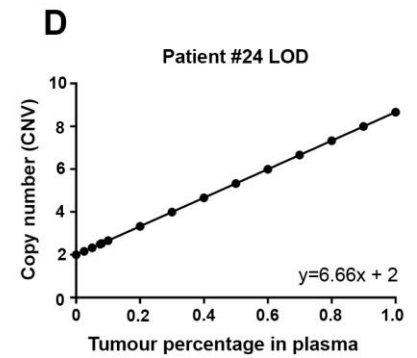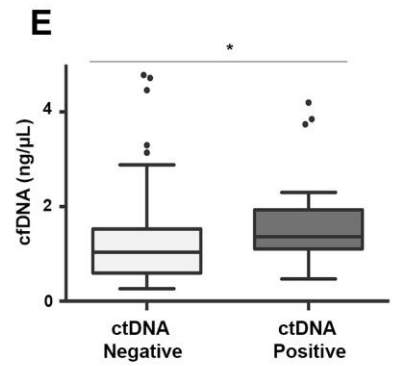

Figure S2. (A) Fragment distribution of the cfDNA extracted from the plasma of patients with EC analyzed with TapeStationHS1000 (Agilent). (B) Representative example of the correlation between the expected and obtained ratios in a LOD ddPCR assay to detect a point mutation in *PIK3CA* (R88Q), LOD = 0.03%. (C) Correlation between the expected number of mutated copies and that obtained after ddPCR to detect a point mutation in *PIK3CA* (R88Q). (D) Representative example of the LOD to detect CNV of the *PIK3CA* gene, LOD = 8.00%.

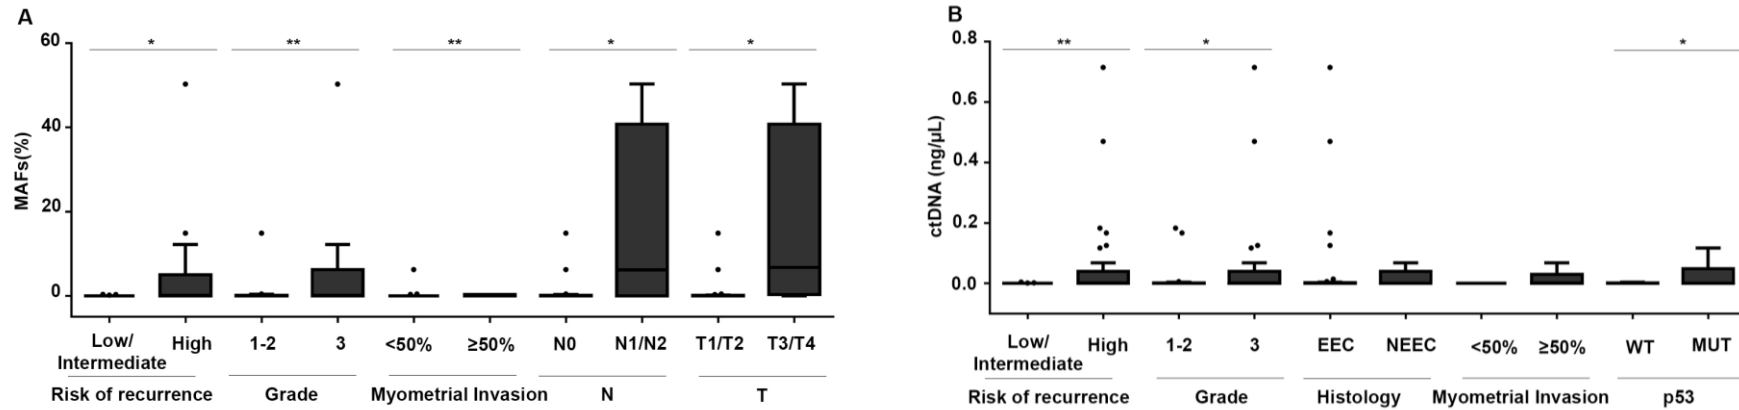

Figure S3. (A) ctDNA levels (MAFs) detected in EEC and grouped according to tumor grade, myometrial infiltration, risk of recurrence, and p53 status (n = 34). (B) ctDNA levels represented as ng/ $\mu$ L in EC and grouped according to tumor grade, myometrial infiltration, risk of recurrence, and p53 status (n = 51).

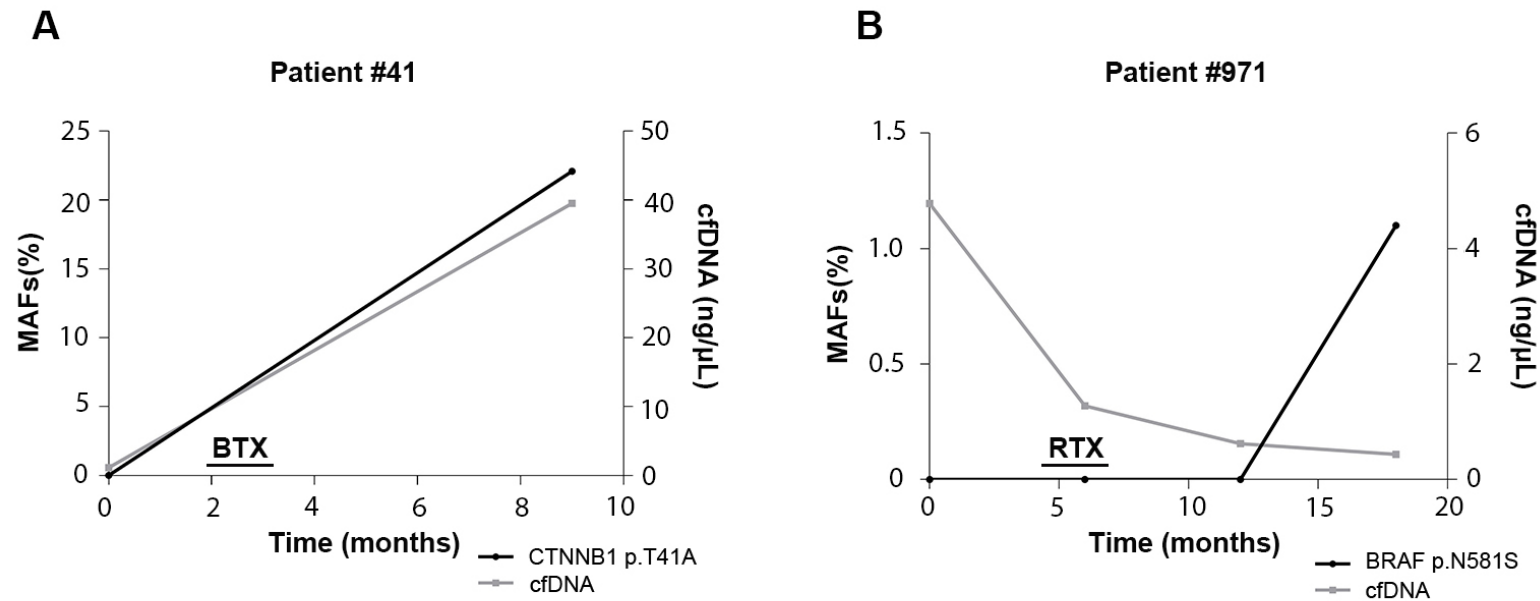

Figure S4. cfDNA and ctDNA levels during disease evolution in two patients with EC that progressed after surgery. (A) Patient #41 (EEC) progressed 7 months after surgery. A point mutation in *CTNNB1* (p.T41A) was found in the UA and then monitored at surgery and progression (PD) with ddPCR. (B) Patient #971 (EEC) progressed 18 months after surgery. A point mutation in *BRAF* (p. N581S) was found in the UA and then monitored at surgery and progression (PD) with ddPCR. RTX: radiotherapy; BTX: brachytherapy.

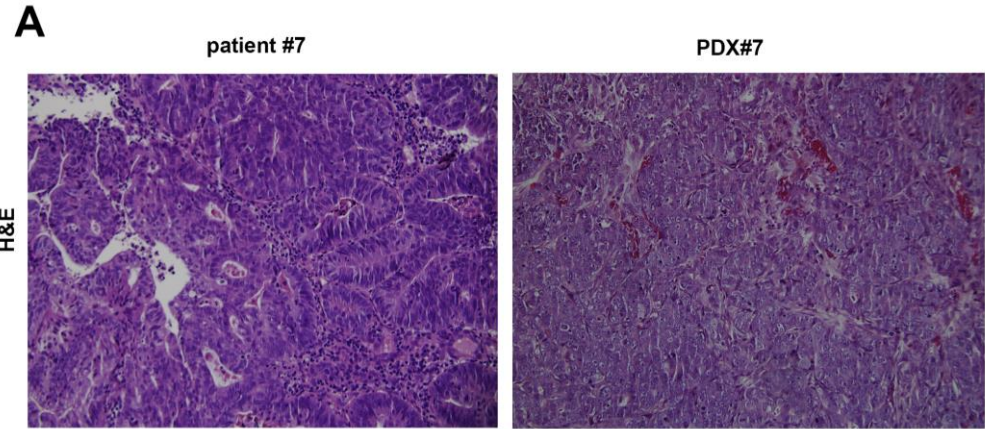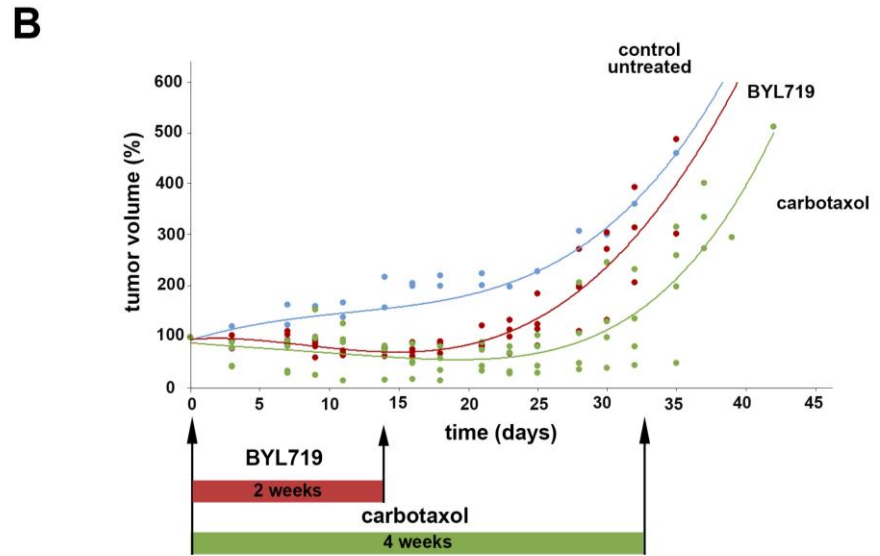

Figure S5. PDX generation from UA as a preclinical model to test targeted therapies in Patient #7. **(A)** Hematoxylin and eosin staining showing the same type of histology in the primary tumor and the PDX. **(B)** PDX tumor growth evolution in response to the treatments. Twelve mice were distributed in three groups: a control untreated group, a control group with standard therapy of carboplatin/paclitaxel (weekly intraperitoneal injection for 4 weeks), and a group with BYL719 orally administered daily for 2 weeks, according to the literature. In the PDX #24 model, continuous administration of BYL719 was maintained until sacrifice because of the promising results with the BYL719 treatment (Figure 5).
